# Supplementary material for: Use of Sediqualsoft® to Determine the Toxicity of Cigarette Butts to Marine Species: A Weather Simulation Test
Source: MDPI journal article supplement (doi:10.3390/jmse9070734), 2021-07-02
Supplement: s1 [file s1]

Article

# Use of SediquaSoft® to Determine the Toxicity of Cigarette Butts to Marine Species: A Weather Simulation Test

Manuela Piccardo <sup>1</sup>, Francesca Provenza <sup>1,2</sup>, Serena Anselmi <sup>2</sup>, Andrea Broccoli <sup>2</sup>, Antonio Terlizzi <sup>1,3,4</sup> and Monia Renzi <sup>1,3,\*</sup>

<sup>1</sup> Dipartimento di Scienze della Vita (DSV), Università degli Studi di Trieste, Via Giorgeri, 10, 34127 Trieste, Italy; [manuela.piccardo@phd.units.it](mailto:manuela.piccardo@phd.units.it) (M.P.); [francesca.provenza@bsrc.it](mailto:francesca.provenza@bsrc.it) (F.P.); [aterlizzi@units.it](mailto:aterlizzi@units.it) (A.T.)

<sup>2</sup> Bioscience Research Center, Via Aurelia Vecchia, 32, 58015 Orbetello, Italy; [serena.anselmi@bsrc.it](mailto:serena.anselmi@bsrc.it) (S.A.); [andrea.broccoli@bsrc.it](mailto:andrea.broccoli@bsrc.it) (A.B.)

<sup>3</sup> Consorzio Nazionale Interuniversitario per le Scienze del Mare (CoNISMa), Piazzale Flaminio, 9, 00196 Roma, Italy

<sup>4</sup> Stazione Zoologica A. Dohrn, Villa Comunale, 80121 Napoli, Italy

\* Correspondence: [mrenzi@units.it](mailto:mrenzi@units.it)

## S.1. Materials and Methods

### Cigarette Composition

Below is the composition of the cigarettes used for the experiment:

- ECB** Tobacco = 203.3 mg/stick (nicotine = 0.5 mg/stick)  
Glycerol = 47.1 mg/stick  
Water = 36.1 mg/stick  
Cellulose = 10.5 mg/stick  
Guar gum = 6.1 mg/stick  
Propylene glycol = 2.4 mg/stick  
Natural and artificial flavourings = 0.638 mg/stick  
Filtration material = 357.5 mg/stick  
Paper and wrappers = 100.9 mg/stick  
Tipping paper and tipping paper inks = 20.2 mg/stick  
Adhesives = 10.8 mg/stick
- CCB\*** Tobacco = NA (nicotine = 0.7 mg/stick)  
Water = NA  
Propylene glycol = NA  
Sugars (sucrose and/or invert sugar) = NA

Glycerol = NA

Natural and artificial flavouring = NA

Filtration material = NA

Paper and wrappers = NA

Tipping paper and tipping paper inks = NA

Adhesives = NA

\*NA = Non-Available. About the CCB the producer doesn't explain the single concentration of the stick components.

**Artificial Sea Water (ASW) Composition.** Quantity expressed in g/L.

- 1- NaCl = 22.0
- 2-  $\text{MgCl}_2 \cdot 6\text{H}_2\text{O}$  = 9.7
- 3-  $\text{Na}_2\text{SO}_4$  = 3.7
- 4-  $\text{CaCl}_2 \cdot 2\text{H}_2\text{O}$  = 1.32
- 5- KCl = 0.65
- 6-  $\text{NaHCO}_3$  = 0.2
- 7-  $\text{H}_3\text{BO}_3$  = 0.023

**Composition of the Nutrients used for *P. tricornutum* Test:**

- S1 =**  $\text{FeCl}_3 \cdot 6\text{H}_2\text{O}$  = 48 mg/L  
 $\text{MnCl}_2 \cdot 4\text{H}_2\text{O}$  = 144 mg/L  
 $\text{ZnSO}_4 \cdot 7\text{H}_2\text{O}$  = 45 mg/L  
 $\text{CuSO}_4 \cdot 5\text{H}_2\text{O}$  = 0.157 mg/L  
 $\text{CoCl}_2 \cdot 6\text{H}_2\text{O}$  = 0.404 mg/L  
 $\text{H}_3\text{BO}_3$  = 1140 mg/L  
 $\text{Na}_2\text{EDTA}$  = 1000 mg/L
- S2 =** Thiamin hydrochloride = 50 mg/L  
 Biotin = 0.01 mg/L  
 Vitamin B<sub>12</sub> (cyanocobalamin) = 0.10 mg/L
- S3 =**  $\text{K}_3\text{PO}_4$  = 3.0 g/L  
 $\text{NaNO}_3$  = 50.0 g/L  
 $\text{Na}_2\text{SiO}_3 \cdot 5\text{H}_2\text{O}$  = 14.9 g/L

**Preparation of Leachates and Elutriates**

Before exposure to target species, in some case parameters were corrected to comply with the standardized requirements of the eco-toxicological tests. In detail, pH was corrected by the addition of few microliters of NaOH and HCl 1M. Corrections are specified in Table 1 by means of \*.

**Table S1.** Experimental conditions required by the applied methods.

| Species               | Endpoint                      | Type    | Method                                                                    | Salinity<br>PSU | Temperature<br>°C | Test duration                                               | Illumination                                       |
|-----------------------|-------------------------------|---------|---------------------------------------------------------------------------|-----------------|-------------------|-------------------------------------------------------------|----------------------------------------------------|
| <i>A. fischeri</i>    | Inhibition of bioluminescence | Acute   | UNI EN ISO 11348-3:2019                                                   | > 20            | 15 ± 1            | 15 minutes<br>30 minutes                                    | -                                                  |
| <i>P. lividus</i>     | Larval development            | Chronic | EPA/600/R-95-136/Sezione 15 +<br>ISPRA Quaderni Ricerca Marina<br>11/2017 | 35 ± 1          | 18 ± 1            | 72 hours                                                    | Darkness                                           |
| <i>P. lividus</i>     | Fertilization                 | Acute   | EPA/600/R-95-136/Sezione 16 +<br>ISPRA Quaderni Ricerca Marina<br>11/2017 | 35 ± 1          | 18 ± 1            | 40 minutes<br>(20 min exposition +<br>20 min fertilization) | -                                                  |
| <i>P. tricornutum</i> | Growth inhibition             | Chronic | UNI EN ISO 10253:2017                                                     | 30 ± 1          | 20 ± 2            | 72 hours                                                    | 24/24 h light<br>6000-10,000 lux from<br>both side |

**Table S2.** Endpoint values obtained from the analyses of negative and positive controls during experiments.

| Species                                   | Negative Control     |        |                    | Positive Control            |                               |                                       |
|-------------------------------------------|----------------------|--------|--------------------|-----------------------------|-------------------------------|---------------------------------------|
|                                           | Medium               | Mean   | Standard Deviation | Substance                   | Value                         | Standard Deviation Confidential limit |
| <i>A. fischeri</i>                        | ASW                  | 0.0 %  | 0.0                | 3,5-dichlorophenol 3.4 mg/L | 15': 37.46%<br>30': 36.11%    | 15': 1.88<br>30': 2.27                |
| <i>P. lividus</i><br>(Larval development) | ASW                  | 5.67 % | 1.15               | Copper (II) nitrate         | EC <sub>50</sub> : 28.26 µg/L | 26.90–29.69 µg/L                      |
| <i>P. lividus</i><br>(Fertilization)      | ASW                  | 0.0 %  | 0.0                | Copper (II) nitrate         | EC <sub>50</sub> : 57.43 µg/L | 33.58–98.24 µg/L                      |
| <i>P. tricornutum</i>                     | algal culture medium | 0.0 %  | 1.61               | Potassium dichromate        | EC <sub>50</sub> : 21.61 mg/L | 16.78–27.83 mg/L                      |
